# Supplementary material for: Opposite development of short- and long-range anterior cingulate pathways in autism
Source: Springer Nature journal article supplement (doi:10.1007/s00401-018-1904-1), 2018-09-06
Supplement: MOESM1 [file 16103164]

**SUPPLEMENTARY TABLE 1**

Clinical characteristics of subjects with autism

| Subject number<br>(ASD group)     | Score on Autism Diagnostic Interview-Revised |                                                  |                                            |                                               |
|-----------------------------------|----------------------------------------------|--------------------------------------------------|--------------------------------------------|-----------------------------------------------|
|                                   | Social<br>Cutoff: 10                         | Communication<br>Cutoff (V): 8<br>Cutoff (NV): 7 | Restrictive and<br>Repetitive<br>Cutoff: 3 | Early<br>Abnormal<br>Development<br>Cutoff: 1 |
| 5144                              | 28                                           | 20 (V), 12 (NV)                                  | 3                                          | 3                                             |
| 4021                              | 22                                           | 14 (NV)                                          | 8                                          | 4                                             |
| 4029                              | 20                                           | 8 (NV)                                           | 3                                          | 3                                             |
| 5308 <sup>#</sup>                 | 17                                           | 14 (V), 14 (NV)                                  | 4                                          | 3                                             |
| 1182                              | ***                                          | ***                                              | ***                                        | ***                                           |
| AN01293<br>(B-6349)               | 26                                           | 12 (NV)                                          | 5                                          | 4                                             |
| AN03221                           | 27                                           | 16 (V)                                           | 8                                          | 5                                             |
| AN03345<br>(B-6399)               | 14                                           | 9 (NV)                                           | 6                                          | 5                                             |
| AN13872<br>(B-7002)               | **                                           | **                                               | **                                         | **                                            |
| AN08873 <sup>##</sup><br>(B-5569) | 22                                           | 14 (NV)                                          | 6                                          | 5                                             |

|                                   |     |                 |     |     |
|-----------------------------------|-----|-----------------|-----|-----|
| AN04682<br>(B-7079)               | 22  | 13 (V)          | 5   | 5   |
| HSB4640 <sup>c</sup>              | *** | ***             | *** | *** |
| AN-06746 <sup>a</sup><br>(B-4541) | 26  | 18 (V), 13 (NV) | 6   | 5   |
| AN-18892 <sup>b</sup><br>(B-4871) | 18  | 14 (V)          | 6   | 3   |
| AN-08792 <sup>c</sup><br>(B-5173) | 22  | 12 (NV)         | 2*  | 5   |
| AN-07770<br>(B-6232)              | 12  | 14 (V)          | 8   | 5   |
| AN-11989<br>(B-6677)              | 26  | 22 (V)          | 12  | 5   |

Other diagnosed disorders included, <sup>a</sup>: schizophrenia; <sup>b</sup>: depression; <sup>c</sup>: seizures.

#: Neuropathologic examination of 5308 suggested possible hypercellular cortex with microdysgenesis, partially confirmed by the stereologic neuron density counts we conducted.

However, axon density and size were not affected.

##: Medical history and interviews indicate that this individual did not feel pain.

(V): verbal communication score; (NV): non-verbal communication score

\*: score was below cutoff threshold due to physical limitations and poor motor skills of donor.

However, family members reported repetitive behaviors at a younger age. With this exception, which is not an unusual pattern in the behavioral domain, all donors had difficulties with

communication, social behaviors, and atypical interests, consistent with a diagnosis of autism, and the ADI-R scores met and exceeded cutoffs for autism in each of these areas.

\*\* : Moderately autistic based on Childhood Autism Rating Scale, Autism Diagnostic Observation Schedule (ADOS), and ADI. Moderately autistic range: 34.5, communication: 6 (autism cutoff 4); reciprocal social interactions 7 (autism cutoff 7).

\*\*\* : Medical history indicates clinical ASD diagnoses, later confirmed by administration of ADI-R.
